# Supplementary material
Source: PubMed Central journal article supplement (PMC9725064)
Supplement: EIJ-D-20-00572_Megaly_SD.pdf [file EIJ-D-20-00572_Megaly_SD.pdf]

## Supplementary data

**Supplementary Table 1. Microcatheter type and lesion characteristics of the included reports.**

| <b>Characteristics</b>                 | <b>N=378</b> |
|----------------------------------------|--------------|
| <i>Microcatheter type</i>              |              |
| Caravel, n (%)                         | 148 (39.2%)  |
| Corsair, n (%)                         | 71 (18.9%)   |
| Corsair Pro, n (%)                     | 11 (2.9%)    |
| Finecross MG, n (%)                    | 10 (2.6%)    |
| Turnpike, n (%)                        | 37 (9.8%)    |
| Turnpike Gold, n (%)                   | 1 (0.3%)     |
| Turnpike LP, n (%)                     | 53 (14%)     |
| Turnpike Spiral, n (%)                 | 47 (12.4%)   |
| <i>Target vessel</i>                   |              |
| Left main coronary artery, n (%)       | 5 (1.3%)     |
| Left anterior descending artery, n (%) | 93 (24.6%)   |
| Diagonal, n (%)                        | 4 (1.1%)     |
| Left circumflex, n (%)                 | 65 (17.2 %)  |
| Right coronary artery, n (%)           | 104 (27.5%)  |
| <i>Lesion type</i>                     |              |
| <b>Chronic total occlusion, n (%)</b>  | 141 (37.3%)  |
| <i>Retrograde approach used, n (%)</i> |              |
| Tortuous lesion, n (%)                 | 58 (15.3%)   |
| Calcified lesion, n (%)                | 225 (59.5%)  |
| In-stent restenosis, n (%)             | 9 (2.4%)     |

**Supplementary Table 2. Failure mechanism and clinical consequences according to microcatheter type.**

| <b>n (%)</b>                                | <b>Caravel<br/>(n= 148)</b> | <b>Corsair<br/>(n=71)</b> | <b>Corsair<br/>Pro<br/>(n=11)</b> | <b>Finecross<br/>MG<br/>(n=10)</b> | <b>Turnpike<br/>(n=37)</b> | <b>Turnpike<br/>Gold<br/>(n=1)</b> | <b>Turnpike<br/>LP<br/>(n=53)</b> | <b>Turnpike<br/>Spiral<br/>(n=47)</b> |
|---------------------------------------------|-----------------------------|---------------------------|-----------------------------------|------------------------------------|----------------------------|------------------------------------|-----------------------------------|---------------------------------------|
| <i>Mechanism of failure</i>                 |                             |                           |                                   |                                    |                            |                                    |                                   |                                       |
| <b>Tip fracture</b>                         | 146 (98.6%)                 | 45 (63.4%)                | 6 (54.4%)                         | 7 (70%)                            | 32 (86.5%)                 | 0 (0%)                             | 35 (66%)                          | 34 (72.3%)                            |
| <b>Due to over-torquing</b>                 | 53                          | 26                        | 4                                 | 2                                  | 11                         | 0                                  | 25                                | 20                                    |
| <b>Due to forceful pulling</b>              | 71                          | 4                         | 0                                 | 2                                  | 0                          | 0                                  | 3                                 | 1                                     |
| <b>Tip was retrieved</b>                    | 55                          | 11                        | 3                                 | 2                                  | 13                         | 0                                  | 15                                | 10                                    |
| <b>Tip stuck in the lesion</b>              | 92 (62.2%)                  | 18 (25.4%)                | 3 (27.3%)                         | 1 (10%)                            | 5 (13.5%)                  | 0 (0%)                             | 4 (7.5%)                          | 4 (8.5%)                              |
| <b>Guidewire stuck in the microcatheter</b> | 6 (4.1%)                    | 23 (32.4%)                | 4 (36.4%)                         | 3 (30%)                            | 1 (2.7%)                   | 0 (0%)                             | 1 (1.9%)                          | 1 (2.1%)                              |
| <b>Proximal shaft and hub separation</b>    | 0 (0%)                      | 0 (0%)                    | 0 (0%)                            | 0 (0%)                             | 3 (2.7%)                   | 1 (100%)                           | 15 (28.3%)                        | 1 (2.1%)                              |
| <b>Shaft fracture and twisting</b>          | 0 (0%)                      | 2 (2.8%)                  | 0 (0%)                            | 2 (20%)                            | 0 (0%)                     | 0 (0%)                             | 0 (0%)                            | 0 (0%)                                |

|                                           |            |          |           |         |           |        |           |           |
|-------------------------------------------|------------|----------|-----------|---------|-----------|--------|-----------|-----------|
| <b>Outer coil or polymer dislodgement</b> | 0 (0%)     | 0 (0%)   | 0 (0%)    | 0 (0%)  | 0 (0%)    | 0 (0%) | 1 (1.9%)  | 7 (14.9%) |
| <i>Clinical consequences</i>              |            |          |           |         |           |        |           |           |
| <b>Perforation</b>                        | 1 (0.7%)   | 4 (5.6%) | 1 (9.1%)  | 0 (0%)  | 0 (0%)    | 0 (0%) | 1 (1.9%)  | 0 (0%)    |
| <b>Dissection</b>                         | 1 (0.7%)   | 1 (1.4%) | 0 (0%)    | 1 (10%) | 0 (0%)    | 0 (0%) | 0 (0%)    | 2 (4.3%)  |
| <b>Death</b>                              | 0 (0%)     | 1 (1.4%) | 0 (0%)    | 0 (0%)  | 0 (0%)    | 0 (0%) | 1 (1.9%)  | 1 (2.1%)  |
| <b>Emergency surgery</b>                  | 7 (4.7%)   | 5 (7%)   | 2 (18.2%) | 1 (10%) | 4 (10.8%) | 0 (0%) | 3 (5.7%)  | 5 (10.6%) |
| <b>Aborted PCI</b>                        | 17 (11.5%) | 7 (9.9%) | 7 (63.6%) | 4 (40%) | 6 (16.2%) | 0 (0%) | 6 (11.3%) | 8 (17%)   |
| <b>Myocardial infarction</b>              | 0 (0%)     | 0 (0%)   | 0 (0%)    | 0 (0%)  | 0 (0%)    | 0 (0%) | 3 (5.7%)  | 0 (0%)    |

PCI: percutaneous coronary intervention
